# 1                    **Circuit-level Mechanisms of EtOH-dependent dopamine release**

2

3

## **Authors and Affiliations**

4   Matteo di Volo<sup>1</sup>, Ekaterina O. Morozova<sup>2,4</sup>, Christopher C. Lapish<sup>5</sup>, Alexey Kuznetsov<sup>4</sup>, Boris  
5   Gutkin<sup>1,7</sup>

6   <sup>1</sup>Group of Neural Theory, INSERM U960 LNC, IEC, Ecole Normale Supérieure Paris 75005,  
7   Department of Physics, <sup>2</sup>Indiana University, Bloomington, IN 47405, <sup>2</sup>Program in Neuroscience,  
8   Indiana University, Bloomington, IN 47405, <sup>3</sup>Institute of Applied Physics, Nizhny Novgorod,  
9   Russia 603950, <sup>4</sup>Department of Mathematical Sciences, Indiana University - Purdue University,  
10   Indianapolis, IN 46202, <sup>5</sup>Addiction Neuroscience Program, Indiana University - Purdue  
11   University, Indianapolis, IN 46202, <sup>7</sup>Center for Cognition and Decision Making, NRU HSE,  
12   Moscow, Russia

13   Corresponding author: Matteo di Volo, [m.divolo@gmail.com](mailto:m.divolo@gmail.com)

14   The authors declare no competing financial interests.

15

16

## **Abstract**

17   Alcoholism is the third leading cause of preventable mortality in the world. In the last decades a  
18   large body of experimental data has paved the way to a clearer knowledge of the specific  
19   molecular targets through which ethanol (EtOH) acts on brain circuits. Yet how these multiple  
20   mechanisms play together to result in a dysregulated dopamine (DA) release under alcohol  
21   influence remains unclear. In this manuscript, we delineate potential circuit-level mechanisms  
22   responsible for EtOH-dependent increase and dysregulation of DA release from the ventral  
23   tegmental area (VTA) into nucleus accumbens (Nac). For this purpose, we build a circuit model  
24   of the VTA composed of DA and GABAergic neurons, that integrate external Glutamatergic  
25   (Glu) inputs to result in DA release. In particular, we reproduced a non-monotonic dose  
26   dependence of DA neurons firing activity on EtOH: an increase in firing at small to intermediate  
27   doses and a drop below baseline (alcohol-free) levels at high EtOH concentrations. Our  
28   simulations predict that a certain level of synchrony is necessary for the firing rate increase  
29   produced by EtOH. Moreover, EtOH's effect on the DA neuron's firing rate and, consequently,  
30   DA release can reverse depending on the average activity level of the Glu afferents to VTA.  
31   Further, we propose a mechanism for emergence of transient (phasic) DA peaks and the increase  
32   in their frequency in EtOH. Phasic DA transients result from DA neuron population bursts, and  
33   these bursts are enhanced in EtOH. These results suggest the role of synchrony and average  
34   activity level of Glu afferents to VTA in shaping the phasic and tonic DA release under the acute  
35   influence of EtOH and in normal conditions.

36

37

## 38 Introduction

39 Alcoholism is the third leading cause of preventable mortality in the world (Mokdad et al.  
40 2004) and causes 2.5 million deaths per year. In the last decades a large body of experimental  
41 data has paved the way to a clearer knowledge of the specific molecular targets through which  
42 ethanol (EtOH) acts on brain circuits (Morikawa et al. 2010).

43 Multiple observations suggest that the behaviors associated with EtOH (seeking,  
44 consumption, etc) are at least partially dependent on the mesolimbic Dopamine (DA) system,  
45 e.g. it has been shown that DA<sub>1</sub> receptor blockade in NAc suppresses EtOH consumption (Dyr  
46 et al. 1993, and Samson et al. 1993 and Gonzales et al. 2004). Acute EtOH has been largely  
47 shown to produce rapid increase of DA concentration in NAc, a brain region crucial for  
48 cognitive processing of reward and reinforcement learning, and hence with a significant role in  
49 addiction (Yim, H. J et al. 2000). Such an effect is thought to be due to the alcohol influence on  
50 the DA neurons in the Ventral Tegmental Area (VTA) that project directly to the NAc (Pierce et  
51 al. 2006). More specifically, after acute alcohol injection, NAc DA shows a significantly more  
52 frequent (as compared to alcohol-free control) high-amplitude transient peaks of concentration  
53 (Covey et al. 2014). Such changes in the dopamine release pattern stems from the effect of  
54 alcohol on the firing activity of DA neurons in the VTA. Alcohol, by modifying their dynamics  
55 and computational properties, produces a dysregulation in DA levels in NAc characterized by  
56 high-amplitude fluctuations. In turn these phasic fluctuations may lead to increased motivational  
57 valence for drug-seeking.

58 In this manuscript we delineate potential circuit-level mechanisms responsible for EtOH-  
59 dependent increase and dysregulation of DA release to NAc. For this purpose we build a circuit  
60 model of the VTA composed of DA and GABAergic neurons, that integrate external  
61 Glutamatergic inputs to result in dopamine released by DAergic neurons at their target sites.

62 In particular, we concentrate on the way EtOH shows a non-monotonic effect on DA  
63 neurons firing activity: an increase in the firing rate at relatively small doses and a drop below  
64 baseline (alcohol-free) levels at high EtOH concentrations. Furthermore, we propose a  
65 mechanism for the increase in DA neurons phasic activity due to EtOH. Finally, we focus on the  
66 effect of EtOH on DA concentration dynamics, by analyzing the emergence of high-amplitude  
67 transient peaks produced by activity of a heterogeneous population of DAergic neurons in the  
68 VTA.

69 We investigate how these features can be reproduced by considering only EtOH effects on  
70 DAergic neuron properties (input conductances and intrinsic currents), not considering the  
71 effects of EtOH on activity patterns of neural populations projecting to DAergic neurons in the  
72 VTA (eg. PFC). The latter is a subject of a separate study.

73 Following experimental observations, we model major targets EtOH on DAergic neurons  
74 (Morikawa et al. 2010), i.e. on their intrinsic properties and on the synaptic receptors activated  
75 by the external inputs. Regarding the first one, we calibrate the model according to *in vitro*  
76 experiments. We thus calibrate EtOH effects on the intrinsic conductances (HCN and GIRK)  
77 according to measurements on EtOH action on DAergic neuron firing rate. Regarding DA  
78 neuron ligand-gated ion channels responsible for integrating external inputs, we simulate EtOH  
79 effect by a calibrated increase in the AMPA-to-NMDA ratio and in the GABA conductance as  
80 suggested in Morikawa et al. (2010).

81 All together, this extrapolation from experimental evidences will permit us to exploit a  
82 circuit model computing EtOH effects on VTA at various concentration. In particular, we will  
83 describe the way VTA processes, under different EtOH doses, external glutamatergic (Glu)  
84 inputs for dopamine release.

85 In the next section, we briefly describe the circuitry we model for DAergic neuron activity  
86 simulation and EtOH effects. The Results section is then divided in three parts. In part 1 we  
87 report simulations showing the model's capability to reproduce a inverted U-shape of EtOH  
88 effect on DA neuron activity observed in *in vivo* measurements: an increase in VTA DAergic

89 neuron average firing rate at relatively low ETOH concentrations, followed by a decrease at high  
90 concentrations. Interestingly, our simulations predict that the EtOH effects on DA neuron  
91 bursting require Glu inputs to DA neurons to be synchronized so as to produce a temporally  
92 varying levels of DA neuron activity. Our modelling results show that Glu inputs to the VTA  
93 need to be synchronized and variable in time in order to produce increased DA cell bursting due  
94 to EtOH intake. Synchronization in AMPA inputs generates higher values of AMPA EPSC.  
95 Nevertheless, the effect here described does not depend on the amount of AMPA current flowing  
96 in DA neurons but on the variability of such current in time as due to synchronous inputs. In  
97 order to emphasize this effect we analyse a reduced model where we increase input  
98 synchronization but we change AMPA conductance in order to keep fixed the average amount of  
99 AMPA current flowing in DA neuron. We show that the only increase in synchronization and  
100 variability in AMPA inputs yields a transition to high rate phasic activity in DA neurons.

101 We describe how a greater hyperpolarizing GABA tone (as driven by EtOH) can increase  
102 DA neuron bursting (as measured by percentage of spikes within bursts, SWB). In Section 2 we  
103 report how EtOH effects depend on the levels of Glu input activity. We show that, while low and  
104 moderate frequency Glu input causes EtOH to have an excitatory effect on the DA neuron,  
105 during high firing rate Glu input, EtOH becomes inhibitory. In fact, in this setup DAergic neuron  
106 is hyperexcited by EtOH and its firing is blocked. Furthermore, we show that the presence of  
107 EtOH changes the temporal dependence of the VTA response to its inputs: over a critical EtOH  
108 concentration, DAergic neuron activity transits from being *in phase* to *antiphase* with respect to  
109 Glu inputs. In part 3, we consider a heterogeneous population of DAergic neurons, that permits  
110 us to generate DA release from VTA. We report that EtOH has an inverted U-shaped effect on  
111 the average DA concentration: an increase followed by a decrease at high EtOH doses. We then  
112 show that EtOH is able to increase transient fluctuations in DA concentration and describe a  
113 mechanism for this increase via synchronization of the VTA DAergic neurons.

114

115

## 116 **Results**

117

### 118 **EtOH & VTA input-output processing: overview of the circuit model**

119 The computational model takes into account the circuitry involved in DAergic neurons  
120 activity in the VTA and its modifications due to EtOH. We model VTA as composed of a  
121 network of electrically (gap-junction) connected and heterogeneous GABA neurons that project  
122 to a heterogeneous population of DAergic neurons (Margolis et al. 2012 and Roeper 2013). This  
123 feed-forward inhibitory circuit is suggested by experimental evidences (Steffeensen et al. 1998).  
124 Furthermore, the VTA receives excitatory inputs from cortical regions, specifically excitatory  
125 cells in the PFC (Carr et al. 2000). Accordingly, for the inputs, we use a putative model  
126 generating Poisson-distributed glutamatergic spike trains with a degree of synchronization  
127 between them that we define as a free parameter. In order to construct such synchrony, we force  
128 a certain fraction  $f_s$  of such neurons to fire almost simultaneously (their firing events are  
129 randomly distributed in a 5ms time window) in certain time windows (see method for more  
130 details and Fig.1A as an example). These inputs, projecting to the VTA, are thus characterized  
131 by two main parameters: the average firing rate (common to all units)  $\nu_{\text{Glu}}$  and their level of  
132 variability taking into account synchronization. This excitatory activity furnishes inputs to the  
133 VTA through AMPA and NMDA receptors located on both GABA and DA neurons. The latter

134 receive also an inhibitory input through GABA<sub>A</sub> receptors (see method section). In Fig.1A we  
 135 show a cartoon of such circuitry.  
 136

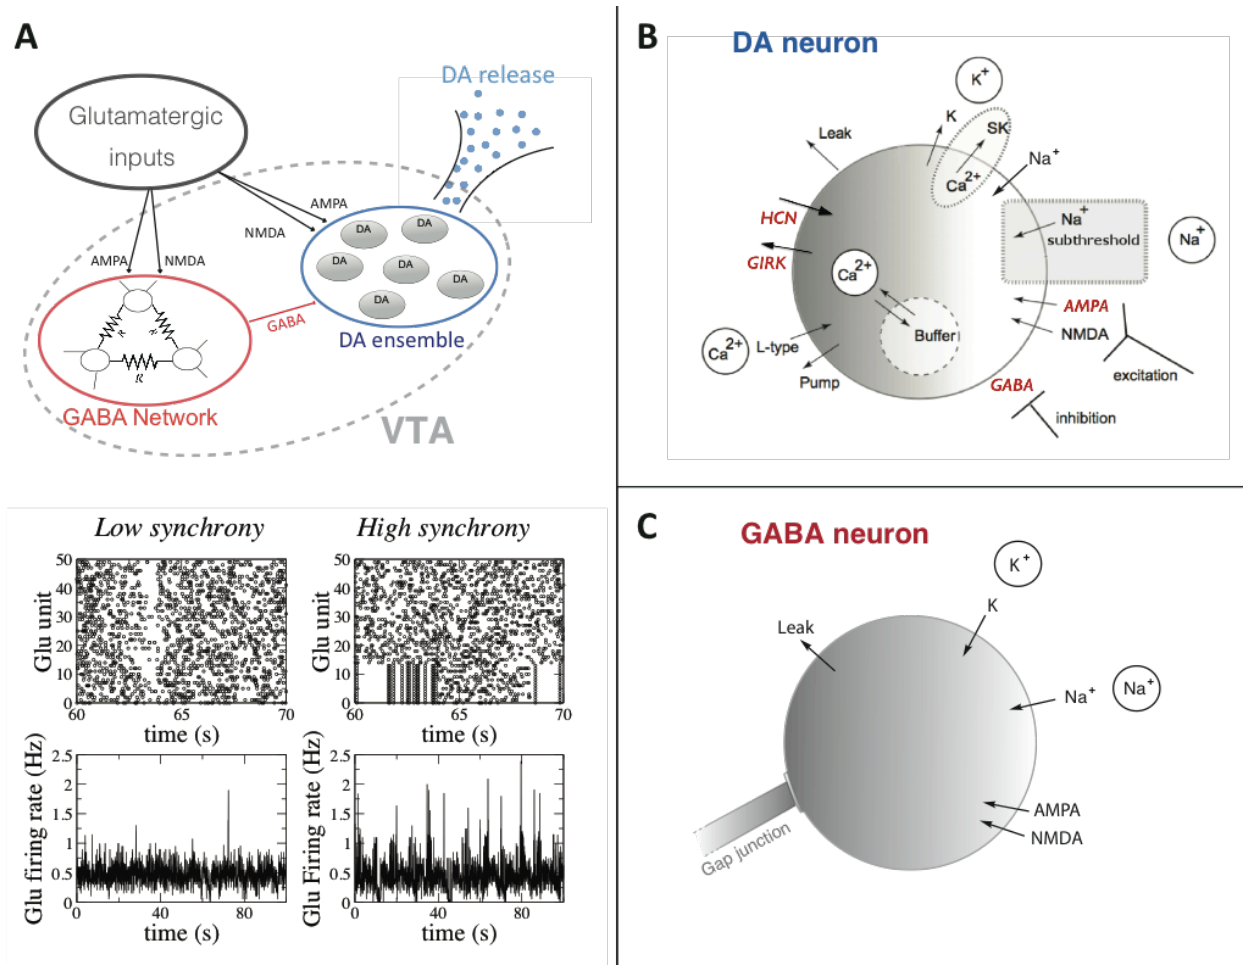

137  
 138 **Figure 1: A cartoon of the Glu-VTA-DA circuit model.** A) On the top, a population of Glutamatergic neurons  
 139 send inputs processed by the VTA, which is composed of a population of electrically connected GABA neurons and  
 140 a heterogeneous population of DAergic neurons. On the bottom, an example of Glu units firing pattern in the  
 141 asynchronous and quasi-synchronous ( $f_s$  16%) case. The Glu firing rate has been calculated through a normalized  
 142 spike count of the population in a time bin of 10ms. B) Schematic view of an individual DAergic neuron model. In  
 143 red we show the channels and conductances affected by EtOH. DA release from the DAergic neurons is computed  
 144 through a synaptic release model. C) Schematic view of an individual GABAergic neuron model.

145  
 146 The cascade of excitatory inputs is processed by the VTA local circuit, whose output (DA  
 147 release) is computed through a synaptic DA release model developed by Wightemann et al.  
 148 (1990), thus completing the structure of Glu-VTA-DA outflow circuit model.

149 On the bottom of Fig1A we show an example of Glu units firing pattern (asynchronous and  
 150 quasi-synchronous) with the relative measure of the population firing rate (normalized spike  
 151 count) showing higher fluctuations in the quasi-synchronous case. In panels B and C we show  
 152 the model of DA and GABA neurons, described in detail in the method section.

153 We will investigate how EtOH, through its action at the level of VTA, affects the input-  
 154 output processing in this nucleus. For this purpose, we model the two most well-known classes  
 155 of EtOH effects at the level of DAergic neurons. We include (1) the synaptic effects of EtOH,  
 156 the increase in the GABA conductance as well as in the ratio of AMPA and NMDA synaptic  
 157 currents in DA neurons, and (2) the DA neuron intrinsic excitability change due to increased  
 158 HCN and GIRK channel conductances (see method section).

159

160 **1. Impact of input synchronization on EtOH-evoked modification of DA**  
 161 **neuron activity.**

162

163 In this section we describe the effects of various concentration of EtOH on the firing activity of a  
 164 single DAergic neuron. In particular, we describe how EtOH effects are modified in two  
 165 different Glu input states. In the first case we consider asynchronous inputs. These input patterns  
 166 (Glu firing rate as in Fig.1) are characterized by a relatively low variability ( $f_s=0\%$ , the  
 167 coefficient of variation of the Glu firing rate, as reported in Fig 1A is around 0.4). In the second  
 168 case, we constrain a certain fraction of inputs to be synchronous (equal to  $f_s=14\%$ , the coefficient  
 169 of variation of Glu firing rate, as reported in Fig 1A is around 0.65), obtaining input with a high  
 170 degree of temporal variation.

171

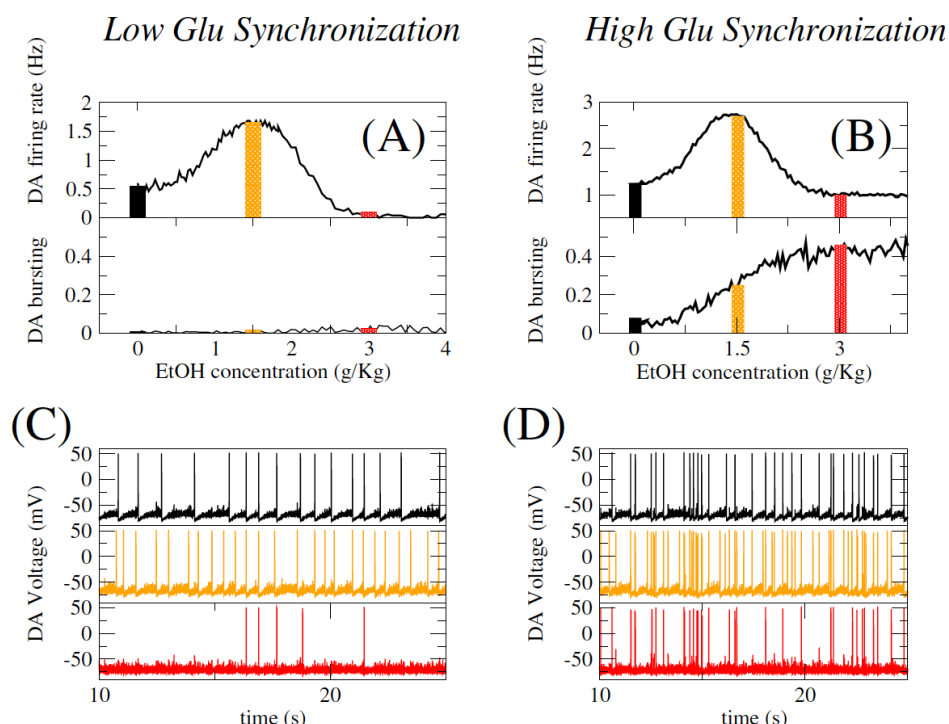

172

173 **Figure 2: If combined with Glu input variability, EtOH boosts DA neuron activity and burstiness.** On the left  
 174 we report the effects of EtOH on DA neuron firing activity in a case where Glutamatergic inputs are asynchronous.  
 175 We report firing rate and burst measure (fraction of spikes within bursts, see methods). On lower panels, we report  
 176 the voltage trace of the DA neuron for three different EtOH concentrations ( 0, 1.5 and 3 g/Kg). On the right, we  
 177 report the same measures but for a case in which glutamatergic units have a certain level of synchronization  
 178 ( $f_s=14\%$ , see Fig.1)

179

180 ***DAergic neuron firing rate shows U-shaped dependence on EtOH concentration***

181

182 We first investigated effects of EtOH in our model on the firing rate of the target DA  
 183 neuron. Our simulations show that under both the asynchronous (Fig2 left column) and partially  
 184 synchronized (Fig2, right column) glutamatergic input, EtOH has a dual effect on the DA cell  
 185 firing rate. In fact, for both cases, relatively low doses of EtOH progressively increase the firing  
 186 rate up to a maximum, with a reversal of this effect at higher doses, and even a depression with  
 187 respect to control at maximal doses. Thus the EtOH effect on the firing rate shows an inverted U-  
 188 shaped curve. By carefully analyzing our model, we can explain this U-shaped response by two  
 189 complementary mechanisms depending on endogenous cell excitability and glutamatergic  
 190 synaptic transmission in the first case, and dose-delayed GABA response in the second. First, at  
 191 sufficiently low EtOH concentrations, the increase in AMPA and HCN channel conductance by  
 EtOH produces an increase in DA neuron average firing rate (0-2 g/Kg). At these doses GABA

192 conductance is not highly affected by EtOH. On the contrary, at high EtOH concentrations (e.g.  
193 3g/Kg), GABA conductance on the DA neuron becomes sufficiently high to decrease the DA  
194 firing rate and bring it to smaller values compared to the baseline (no EtOH). We thus surmise,  
195 that for the effects on the firing rate, the EtOH effects on single DA neuron properties are  
196 sufficient to account for the inverted u-shaped effects observed in in-vivo experimental  
197 measurements (Mereu et al. 1984). This effect is observed regardless of the synchronization level  
198 of Glutamatergic inputs.

199

### 200 ***EtOH boosts DA neuron burstiness mediated by synchronization of Glu inputs***

201

202 Experimental studies have shown that EtOH increases burstiness in DAergic neuron firing  
203 activity (Morikawa et al. 2010). We thus set out to understand how glutamatergic input  
204 variability may impact the EtOH effects on the burstiness (measured as percentage of spikes  
205 within bursts, SWB, see methods) of the DA neuron and to understand the mechanisms for any  
206 eventual differences.

207 First of all, a visual inspection of simulated DA neuron voltage traces in Fig. 2, shows  
208 substantial difference between the two cases of higher and lower Glu input synchronization  
209 level. In fact, in the case with low input variability EtOH does not increase DA cell  
210 burstiness. In effect, we surmise that under asynchronous glutamatergic drive, EtOH  
211 increases only the DA neuron tonic activity. We can clearly see that for higher  
212 synchronization levels in Glutamatergic inputs the situation is markedly different. For this  
213 case, when EtOH concentrations are relatively high, the DA neuron firing pattern is  
214 characterized by the presence of bursts with a high intra-burst firing rate (>12 Hz) and  
215 periods of tonic activity with low firing frequency (1-6 Hz). By measuring the number of  
216 spikes within burst (SWB) at various EtOH concentrations, we observe a monotonic  
217 increase in burstiness for the quasi-synchronous input case as a function of EtOH  
218 concentration. We can understand the mechanism as follows: the phasic firing periods of  
219 DAergic neuron (bursts) are induced by synchronous AMPA EPSPs, and these are amplified  
220 by EtOH through an AMPA conductance increase. At high EtOH concentrations (e.g.3g/Kg),  
221 an increase in GABA conductance on DA neurons starts to dominate (e.g. see above for the  
222 firing rate effects). Nevertheless, such an increase selectively inhibits DA neuron spikes  
223 driven by the tonic AMPA rather than those induced by synchronous AMPA barrages, for  
224 which much higher GABA conductance values are necessary. As a result, DAergic neuron  
225 spikes that are part of phasic firing periods are maintained also at high EtOH concentration,  
226 when GABA conductance is increased, while tonic periods of firing are inhibited. This acts  
227 to further boost the fraction of spikes within bursts at EtOH concentrations that decrease  
228 the overall average firing rate. In fact, this separable effect on the tonic and phasic DA cell  
229 firing by EtOH under partially synchronous glutamatergic input is a prediction of our  
230 model.

231

### 232 ***Glu input synchronization increases DA neuron sensitivity to EtOH***

233

234 While we showed that for a partially synchronized glutamatergic input, EtOH robustly  
235 increases the burst firing in DA neurons as a function of the dose, we wanted to understand how  
236 do different levels of synchronization affect DA neuron sensitivity to EtOH. In order to do so we  
237 simulated our model with Glu inputs that had progressively higher fraction of synchronized  
238 sources of AMPA EPSC's while keeping inhibitory GABA and excitatory NMDA inputs fixed.

239 This unrealistic model (Glutamatergic inputs should activate also NMDA channels) permits  
240 us to elucidate the mechanism of cooperation between input synchronization and the increase on  
241 AMPA conductance after EtOH. Furthermore, in order to emphasize the net effect of Glu input  
242 synchronization, AMPA conductance is changing together with the fraction of synchronous units

243  $f_s$ , in order to keep constant the average AMPA current received by the DA neuron and  
 244 investigate the effect of synchronization only.  
 245

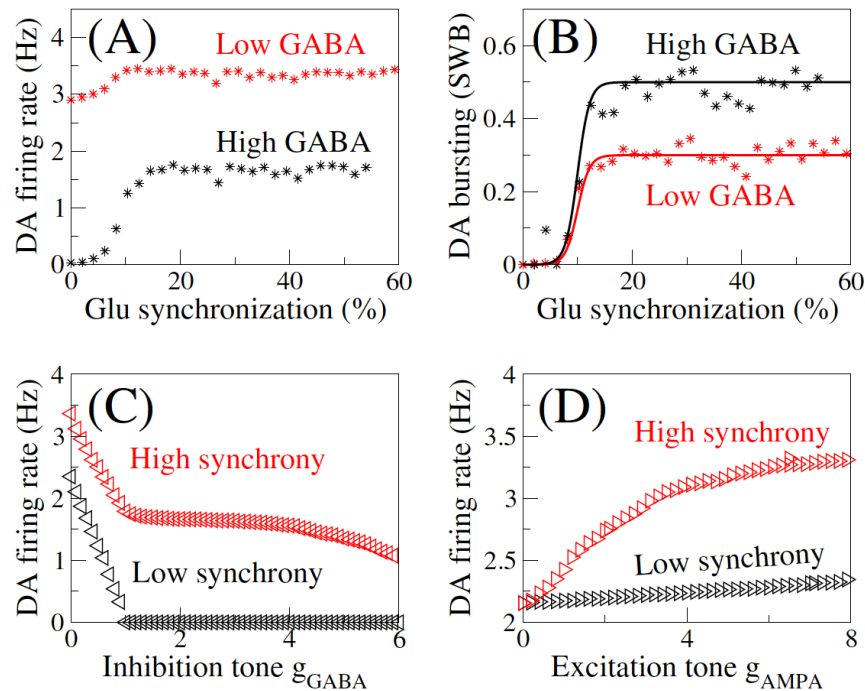

246  
 247 **Figure 3: Glu input synchronization, EtOH targets and DA neuron activity.** We report here the result of a  
 248 reduced model: Glu population activity drives only the AMPA input signal to DA neuron, whereas NMDA  
 249 conductance is set to zero and we consider a tonic GABA IPSC. In top panels: DAergic neuron average firing rate  
 250 and burst measure respectively as a function of the fraction of synchronous glutamatergic units. For every value of  $f_s$   
 251 the total amount of AMPA EPSC is kept constant by rescaling appropriately AMPA conductance (equal to 0.03  
 252 mS/cm<sup>2</sup>). Lower panels show the effect of increasing tonic GABA (here AMPA conductance is constant  $g_{AMPA} = 8$   
 253 mS/cm<sup>2</sup>) and AMPA conductance (here GABA conductance is zero) for two different values of Glu,matergic  
 254 unitssynchronization (0 and 14%).

255  
 256 Our simulations showed that, past a critical synchronization level (as defined by  $f_s$ ), both  
 257 the firing rate and burstiness increase abruptly (Fig. 3 upper panels). In particular, for  $f_s = 10\%$ ,  
 258 DAergic neuron exhibits a transition to bursting dynamics (in the sense of a sharp increase in the  
 259 burst measure). We further compared the effect of AMPA synchronization across different  
 260 values of tonic GABA input (Figure 3 lower panels). We find that with increased GABA  
 261 conductance the qualitative pattern does not change, yet the level of burstiness is significantly  
 262 increased. In fact, we see generally that above a critical Glu synchronization level, DA cell  
 263 bursting increases with increasing GABA conductance. Hence our simulations imply amplified  
 264 sensitivity of DAergic neurons to input synchronization for higher GABA input strength. In  
 265 other words, the more is the DA neuron inhibited, the more sensitive its burstiness is to  
 266 synchronous vs. asynchronous excitatory inputs. On the other hand, bottom left panel of Fig. 3  
 267 shows that increased GABA conductance monotonically depresses the DA neuron average firing  
 268 rate, albeit stronger for asynchronous Glu inputs. In Fig 3 lower right panel, we turn to another  
 269 crucial target of EtOH: the increase of tonic AMPA conductance. We observe that an increase in  
 270 AMPA conductance on the DA neuron increases its firing activity. Nevertheless, we see that the  
 271 DA neuron is much more sensitive to such increase in the case of synchronous inputs, while in  
 272 the asynchronous case the increase of AMPA conductance is much less effective.

273  
 274  
 275  
 276  
 277

## 2. EtOH effects depends on the average glutameatergic input firing rate

278  
279  
280  
281  
282  
283  
284  
285  
286  
287  
288  
289  
290  
291  
292  
293  
294  
295

As we saw above, the glutamatergic input synchronization has a significant effect on how sensitive the DA firing patterns are to the EtOH concentration. We reasoned that the average firing rate of the glutamatergic input should also have strong effects on EtOH impact on the DA neuron activity. In order to investigate the correlation of DA neuron activity with glutamatergic rate changes we first investigate the effect of increasing the average firing rate of glutamatergic neurons in an asynchronous case. The main result presented in this section regarding DA neuron average firing rate and is not qualitatively affected by increasing synchronization. We then consider glutamatergic units whose firing pattern follows a Poissonian spike rate with an average changing in time periodically at a certain frequency. It has been shown that cortical regions sending glutamatergic projections to VTA show a prominent coherence with VTA itself and hippocampus at 4 Hz (Fujisawa et al. 2011). By considering such oscillations in inputs we report an interesting interaction between EtOH and oscillatory activity in Glutamatergic inputs: in function of the Glu input rates, EtOH can produce a switch from in phase to antiphase activity of DA neurons with respect to these same inputs (this effect is much more visible for slower Glu input oscillations).

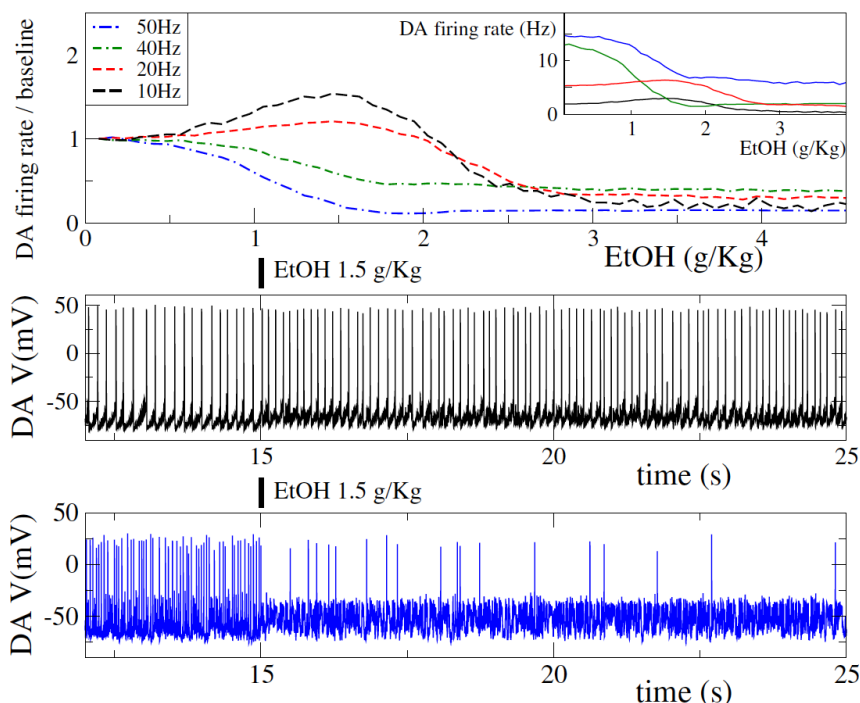

296  
297  
298  
299  
300  
301  
302

**Figure 4: A transition to monotonic inhibition by EtOH at high Glu input activities: EtOH changes input processing of DA neurons in the VTA.** We consider here Glu inputs with a firing rate at various frequencies as reported in the legend. Upper panel shows DA average firing rate with respect to baseline (no EtOH) for the four different Glu frequencies considered. In the inset we show for completeness the real DA neuron firing rate in Hz. Middle panel shows the trace of DA neuron membrane potential for low Glu frequency (10Hz), after 15 seconds EtOH is presented at 1.5g/Kg. Lower panel reports the same for higher Glu frequency (50 Hz).

303  
304  
305

### *EtOH inhibits Dopaminergic neuron activity in high frequency Glu input state*

306  
307  
308  
309  
310  
311

Fig.4 shows model simulation results reporting the effects of the Glutamatergic input average firing rate on EtOH influence. We show that, while for relatively low values of  $v_{Glu}$  we observe the U-shaped curve of the DA firing rate as a function of the EtOH dose (as we reported above), in conditions of high  $v_{Glu}$ , EtOH has a monotonic inhibitory effect on DA average firing activity. We propose that this is due to an increase in the tonic component of the AMPA conductance during EtOH administration, which, as we have shown before, can silence DA



312 neurons by driving it into depolarization block (Ha and Kuznetsov, 2013). Hence, in our  
313 simulations, we see that increasing AMPA conductance speeds up the DA neuron firing but, over  
314 a certain threshold value, the DA neuron stops firing. To understand these effects in detail, let us  
315 first consider the case of low  $v_{\text{Glu}}$ . In middle panel of fig 4, we simulate voltage trace of a DA  
316 neuron receiving a glutamatergic input at relatively low Glu input rate (10Hz). Upon EtOH  
317 application (at 15 seconds), the increase in AMPA conductance has the effect of increasing DA  
318 firing activity. On the contrary, in the case case of high  $v_{\text{Glu}}$  (lower panel), the DA neuron  
319 activity decreases after EtOH injection even if DA neuron is still able to emit some spikes due to  
320 noise in inputs. Accordingly, the tonic asynchronous component of Glutamatergic inputs  
321 converging into DA neurons can produce a switch in EtOH effects for DA release, i.e. when such  
322 component is strong EtOH shows a monotonic inhibitory effect on DA activity.

323  
324  
325

### 326 *DAergic neuron and Glutamatergic input coherence*

327

328 As we see above, EtOH can have a significant effect on the dynamics of the VTA response  
329 to incoming Glutamatergic inputs. In previous section the firing rate of Glutamatergic neurons  
330 was constant in time. Here, in order to simulate observed oscillations in prototypical cortical  
331 inputs to the VTA we consider oscillations in Glutamatergic units firing rate. In particular, we  
332 consider theta (4Hz) and delta (1Hz) oscillations. In upper panels of Fig 5 we report the time  
333 evolution of Glu units firing rate where we see that, in the case here considered the maximum  
334 firing rate is around 50Hz. For such value we know from previous section that DA neuron spikes  
335 are blocked from EtOH. In the left panels we report the voltage trace of DA neurons for delta  
336 oscillations in Glutamatergic inputs. We observe that DA spikes are suppressed at the peaks of  
337 incoming activity when EtOH is present (lower panel). Accordingly while at zero EtOH  
338 concentration the DA firing rate is in phase with the Glutamatergic rate (spikes happen around  
339 the high level of glutamatergic activity), at high EtOH doses DA activity turns out to be in  
340 antiphase with incoming inputs. Hence, the overall conclusion is that higher Glu input levels  
341 together with EtOH administration change the relative coherence structure of the DA cell  
342 activity: switching it from in phase to out of phase with respect to the cortical activity. This  
343 phase/antiphase effect is much clearer considering slower input rate oscillations like delta waves.  
344 In fact, in the case of theta oscillations (right column) this effect is less visible and it seems that  
345 there is a non trivial relationship between oscillation frequencies of Glutamatergic inputs and the  
346 typical time scales of DA neuron intrinsic activity. Nevertheless, even for these faster input  
347 frequencies we observe that EtOH changes the coherence between DA and Glutamatergic  
348 activity.

349

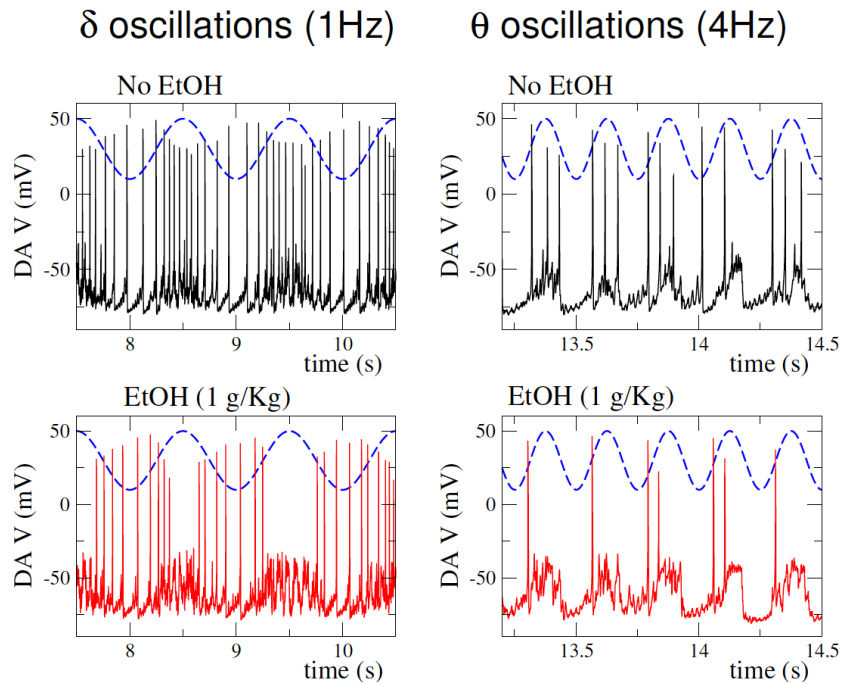

350  
351  
352  
353  
354  
355

**Figure 5: High Glu firing activity guides a transition from in-phase to antiphase DA neuron activity with respect to excitatory inputs.** We consider here two different Glutamatergic inputs with a firing rate oscillating like a cosine  $v_{Glu}=A(\cos(2\pi vt)-1)+v_0$ . Here  $v_0=10\text{Hz}$ ,  $A=20\text{Hz}$  and  $v=1\text{Hz}$  or  $4\text{Hz}$  for delta (left panels) or theta (right panels) waves. In top panels we report the time course of  $v_{Glu}$ . In lower panels we report the corresponding DA membrane voltage trace in case of 0 and 1.5g/Kg EtOH concentration.

356  
357  
358  
359

### 3. EtOH amplifies high-concentration Dopamine transients through dopamine neuron synchronization

360  
361  
362  
363  
364  
365  
366  
367  
368  
369  
370  
371  
372  
373  
374  
375  
376  
377  
378  
379  
380  
381  
382  
383  
384

Above we have established how acute EtOH together with glutamatergic inputs leads to complex response patterns from a single DA neuron. Yet we know that the VTA is composed of heterogeneous DA neuron population, whose firing activity regulates the overall DA released. We thus analyze effects of EtOH on DA release from the VTA as a whole by modeling a heterogeneous population of DA neurons in the VTA. We further model spike-based dopamine release for the single DA neurons (see methods section for model details) with the overall DA release modeled as the superposition of these spike-based dopamine transients. Our working hypothesis is that significant increases that are observed in DA concentrations are due to simultaneous firing of DAergic neurons that generate transient peaks of the overall DA release. Hence we hypothesize that synchronization of VTA DA neurons is key to DA release dynamics. Consistent with data (REF) we consider mutual coupling between VTA DA neurons as not being significant, hence it is only common external drive to them that could act as a synchronizing mechanism. If such drive is tonic, i.e. input signal shows little variability (due to a low level of synchronization) DA units with heterogeneous properties will not synchronize their firing times. In fact, heterogeneous neuron population receiving time-invariant common inputs would emit spikes depending on their specific properties. On the contrary, a transient peak in excitatory input would kick all DA units' voltage toward the spiking threshold, thus generating a synchronous population burst. In order to test this hypothesis, we simulated 100 DA neurons all receiving common glutamatergic inputs characterized by a certain level of synchronization ( $f_s=14\%$ , see Fig.1) and whose heterogeneity was implemented by individual changes in the leakage current picked randomly from a uniform distribution in  $[0.13:0.23]$  mS/cm<sup>2</sup> (see methods). This ensured that these DA neurons differed in their intrinsic excitability. The DA release is calculated as outlined in the Methods. Our simulations indeed show an inverted U-curve for the average DA release (averaged over a sufficiently long time scale to obtain a reliable average measure, i.e. at least one minute in our simulations), with a maximal DA release at an

385 intermediate EtOH concentration (Fig. 6). The mechanisms standing behind this inverted U  
386 shape is the same discussed for the average firing rate of a single DA neuron (see Fig.2).  
387 Furthermore, by sampling DA concentration with bins of 180 ms we calculate distributions of  
388 the DA levels over an extended period (5 minutes, Fig. XXX). In particular, the figure shows the  
389 probability distributions at low and intermediate EtOH concentrations (around the optimal  
390 dose). The distributions are scaled by the mean (which is also EtOH concentration dependent) to  
391 emphasize the changes in the width. We see that while in control, DA concentrations are  
392 Gaussian distributed around their mean, at the optimal ETOH dose, the distribution shows a  
393 large right tail, meaning that there is a significant number of large DA amplitude episodes.  
394 Accordingly, the variability in the DA release time trace (Fig. XX) shows a clear increase at  
395 these optimal EtOH doses. This underlies another effect of EtOH, i.e. the increased frequency of  
396 large deviations from the basal DA level. This effect is moreover elucidated by the time series  
397 shown in Fig.6, where we plot DA time traces for different EtOH concentration. We observe that  
398 in control condition (EtOH concentration equal to zero) DA stays at an almost constant level  
399 with seldom peaks. At higher EtOH concentrations, we observe an increase in the basal level of  
400 DA and much more frequent peaks of DA release (middle panel). It is crucial to note that for  
401 very high EtOH doses, the DA basal level is reduced, but the peaks are maintained, yielding a  
402 lower DA average release with high time fluctuations. What might be the mechanism driving  
403 these large amplitude fluctuations in the DA concentration? On the left side of Fig.6, we report  
404 the raster for the DA neurons population. We observe that DA peaks of release are driven by  
405 synchronous population bursts in DAergic neuron population. In fact, for low EtOH  
406 concentration, synchronous inputs received by the VTA are not able to evoke spikes in DAergic  
407 units. As a consequence, there are very few DA units firing simultaneously (see the raster plot on  
408 left side of Fig.6) and DA release shows little deviation from the baseline. At higher EtOH  
409 concentration (1-2g/Kg) the increase in AMPA conductance permits the AMPA EPSCs to be  
410 strong enough to evoke synchronous spikes in DAergic neuron population, corresponding to high  
411 DA concentration transients (see middle panels, 2g/Kg). The baseline DA release is also  
412 increased in EtOH. The changes in DA neurons intrinsic activity caused by EtOH are responsible  
413 for this as they increase firing activity throughout the simulation including asynchronous  
414 intervals.

415 Eventually, at EtOH doses above the optimum, EtOH-induced increase in GABA input  
416 inhibits tonic background asynchronous activity of the DA population, thus reducing basal DA  
417 levels. Nevertheless, the synchronous population bursts of DA neurons are only little affected by  
418 EtOH (as described in previous section, see Fig. 2 and 3). Accordingly, at high EtOH doses DA  
419 release is characterized by a lower baseline level but still amplified transient DA peaks.

420 Again, variability and synchronization in input structure turns out to be a crucial ingredient  
421 for evoking transient peaks in DA release. In cooperation with EtOH influence, such correlations  
422 in input structure have a double effect. On one side, they permit EtOH to evoke phasic firing  
423 episodes in single DA units (see Fig.2) and, on the other side, to synchronize these phasic  
424 episodes, thus yielding transient peaks in DA release from VTA.

425

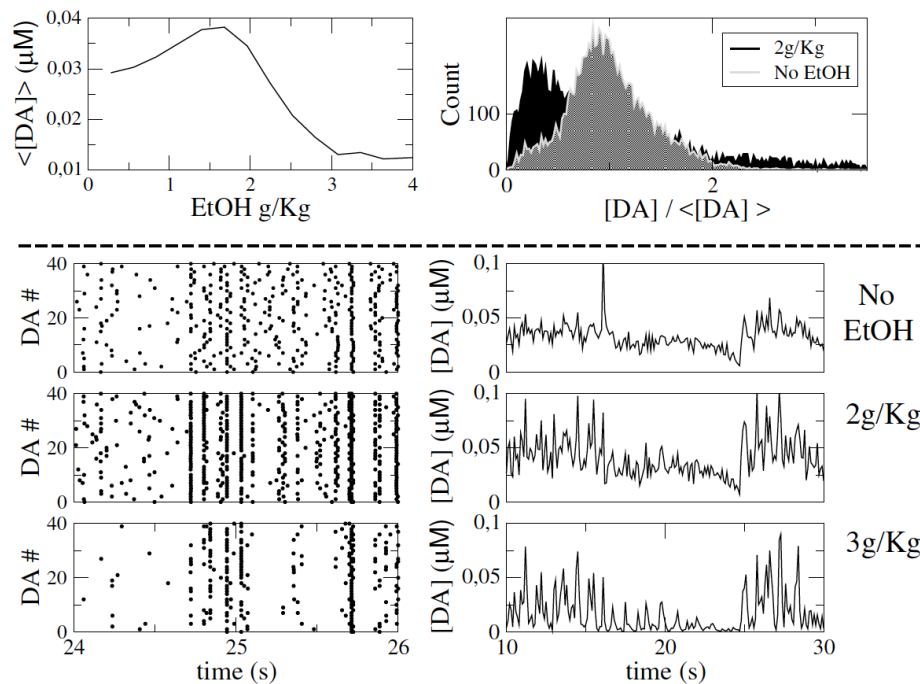

426  
427  
428  
429  
430  
431  
432  
433  
434

**Figure 6. EtOH yields transient release of Dopamine from VTA by enhancing synchronization between DAergic units.**

Top-left: average (over one minute time scale) DA release by the population of 100 DA neurons at various EtOH concentration. (B) Histogram of DA concentration (rescaled by its average) for two EtOH concentration as reported in the legend. Left panels show the raster plot of a subpopulation of DA neurons and the corresponding time trace of DA release at various EtOH concentrations (0,2,3 g/Kg). Glutamatergic inputs are quasi-synchronous ( $f_s=14\%$ ) and  $v_{Glu}=14$  Hz.

435

## 436 Discussion

437

438 Taking advantage of modeling techniques, we built up a circuit model that simulates the  
439 effects of various EtOH concentration on the dynamics of VTA Dopamine neurons and their  
440 Dopamine release. In particular, we focused on the way external Glutamatergic inputs are  
441 processed by VTA and then converted into Dopamine release, as a meaningful output projecting  
442 to NAc regulating reward properties and, ultimately, addiction.

443 By following experimental measures we derived EtOH dependent values of conductance of  
444 HCN channels and GIRK current able to reproduce input independent effects of EtOH observed  
445 in vitro (see method section). We then calibrated EtOH effects on DA neuron input  
446 conductances, i.e. AMPA and GABA.

447 Such a model is able to reproduce EtOH effects at the level of single DAergic neuron and  
448 at the level of their collective activity, i.e. their DA release from VTA to the Nucleus Accumbens  
449 (NAc).

450 In particular, the model correctly predicts the concentration dependent effect of EtOH on  
451 DA neuron firing pattern, i.e. an increase in phasic (bursting) activity and an increase of average  
452 firing rate followed by a decrease at high EtOH concentrations.

453 The mechanism proposed is based on the interplay of EtOH targets and Glutamatergic input  
454 synchronization. In particular, synchronized inputs generate DA neuron phasic activity periods,  
455 whose magnitude and frequency of appearance is increased from AMPA conductance increase  
456 from EtOH. Furthermore, the decrease of DA activity is due to delayed activation of GABA  
457 conductance at higher EtOH concentration, inhibiting tonic DA neuron period of firing.

458 At the level of population activity, the model reproduces an increase in transient peaks of  
459 Dopamine release, that has been reported to be a robust and distinctive effect of EtOH and other  
460 drugs.

461 The mechanism here proposed is based synchronous inputs drive the synchronization of  
462 these phasic periods between different DA neurons, that would be asynchronous otherwise due  
463 to their heterogeneity. Synchronization of DAergic neurons after reward events has been  
464 reported in the midbrain by Joshua et al. (2009). Our model predicts this to be the case also in the  
465 VTA after acute EtOH injection and, more generally, as a result of addictive drugs.

466 The mechanism of synchronization relies on EtOH-mediated enhancement of AMPAR  
467 current that increases the probability to evoke spikes in response to synchronous Glu  
468 pulses. Complementary mechanism of EtOH-mediated synchronization of DA neurons in case  
469 they receive noisy correlated Glu inputs is discussed in our previous work (Morozova et al  
470 2016). We showed that EtOH-mediated enhancement of  $I_h$  and/or AMPA currents produce  
471 higher levels of synchronization between heterogeneous DA neurons by switching their  
472 excitability type to type II. The responses of type II neurons to noisy inputs are more reliable than  
473 of type I neurons (Gutkin et al., 2005; Galan et al., 2007). We showed that synchronous activity  
474 of DA neurons produces higher DA transients. This result further confirms the role of synchrony  
475 in EtOH-evoked enhancement of DA transients.

476 Moreover, the model predicts a different effect of EtOH on VTA DA neurons activity for  
477 different Glutamatergic input rates.

478 We report in fact that for high Glutamatergic input average rate EtOH has a monotonic  
479 inhibitory effect on DA neurons, while for lower input rate it shows the expected increase  
480 followed by a decrease at high EtOH concentration. This result, as the necessity of a certain level  
481 of synchronization, predicts an input dependent effect of EtOH on DA release. In particular, the  
482 way EtOH affects DA release is dependent on the actual state of Glutamatergic inputs, its  
483 synchronization and average rate.

484 It is known that VTA receives Glutamatergic afferents from many regions, like the PFC.

485 Rephrasing our result the model predicts different DA response to EtOH injection for  
486 different PFC activity state. This prediction could be verified by measuring DA concentration in  
487 NAc under different concentration levels or under direct stimulation of PFC.

488 Furthermore, by considering oscillatory firing rate in Glutamatergic inputs (in accordance  
489 with oscillations reported by Fujishawa et al. 2011), our model predicts that Ethanol produces a  
490 switch between in phase to in antiphase DAergic activity with respect to Glutamatergic input. On  
491 the same line with the previous one this prediction could be tested through direct stimulation of  
492 PFC after Ethanol injection.

493 Actually, Ethanol itself affects the firing rate of PFC, specifically by decreasing it (Tu et al.  
494 2007). In the view of our results this would have the effect of decreasing DA neuron firing rate.  
495 Nevertheless, a direct outcome of this model is that the average measures are not the only  
496 properties of afferent signals that affect DA release. In particular, synchronization and  
497 fluctuations of Glutamatergic neurons rate are crucial ingredients to increase DA neuron phasic  
498 activity and, ultimately, DA release transients. Accordingly, an interesting test to be performed  
499 experimentally is if, during in vivo conditions where DA neuron bursting has been showed to be  
500 increased by EtOH like other addictive drugs (Covey et al. 2014), PFC activity increases its  
501 coherence and deviations from average.

502 Another possible mechanism is based on GABA neurons activity in the VTA. It has been  
503 shown that GABA neurons average rate decreases after EtOH injection (Stobbs et al. 2014). This  
504 has the effect of increasing DA neurons activity through disinhibition. Accordingly, the decrease  
505 of afferent excitation to the VTA could increase DA neuron firing rate through this disinhibition  
506 mechanism. In our model this is not the case as the effect of the direct decrease of excitation to  
507 DAergic neuron is stronger than disinhibition.

508 Nevertheless, even hypothesising this to be the case (through some model parameter  
509 arrangement), the decrease of average PFC rate would yield an increase in tonic activity of DA  
510 neurons and not in their phasic periods, responsible for DA transients in NAc. Accordingly,  
511 based on these observations and our modelling results, we predict that EtOH (and it might be the  
512 case for other drugs) should affect coherence and synchronization properties in cortical regions.

513 Furthermore, an increase in synchronization in inputs received by VTA would synchronize also  
514 GABA neurons, which have been reported to boost phasic DA neuron activity when they  
515 synchronize with each others (Morozova et al. J. Neurophysiology 2016).

516 In conclusion, the circuit model here presented is able, from the one side, to reproduce the  
517 observed effect of Ethanol on DA neurons activity and their DA release and, on the other side, to  
518 make testable prediction. In particular, synchronization of DA neurons after EtOH injection is  
519 proposed as the main mechanism for generation of transient peaks of DA concentration in NAc.  
520 Moreover, synchronization in cortical VTA afferents is proposed to be a fundamental ingredient  
521 for increase in DA transients after EtOH injection and, more generally, cortical neurons activity  
522 state can drive opposite effects of EtOH on DA response.

523

524

525

526

527

528

529

## 530 **Methods**

531

532 We describe here the circuit model adopted for modeling the VTA, its input and its output.

533

### 534 ***Inputs: Glutamatergic population.***

535 We use a putative model of the pyramidal cell population in the PFC, generating spike  
536 trains of glutamatergic neurons. Such firing pattern is characterized by two main parameters: the  
537 level of activity and the correlation between units. Every unit emits spikes according to a  
538 Poissonian process with an average firing rate  $\nu_{\text{Glu}}$ . Regarding the units correlation we impose  
539 that, during certain time windows, a fraction  $f_s$  of units emits spikes almost synchronously. In  
540 particular, we force them to be randomly confined in a time interval of 5ms. The time duration of  
541 synchronous and asynchronous time windows is extracted from a poissonian distribution with  
542 the same  $T_s=4s$ . In the raster plot of Fig.1A we show an example with  $\nu_{\text{Glu}}=4\text{Hz}$ ,  $f_s=0$  and 14%  
543 (unit number from 0 to 7, we consider  $N_E=50$  Glutamatergic units).

544 In all our simulations the number of units is fixed at  $N_E=50$ .

545 Changing  $f_s$  yields a change in fluctuations of Glutamatergic units count number  $CN(t)$ , i.e.  
546 normalized (with respect to the number of units) number of spikes of the all population in time  
547 intervals of 50ms (as reported in Fig. 1A).

548 The excitatory activity in this population will furnish the input to the VTA through AMPA  
549 and NMDA receptors located on both GABA and DA neurons. Hence we will convert the spike  
550 trains into synaptic inputs keeping track of PFC to VTA input convergence.

551 The dynamics of AMPA and NMDA receptor is the same in both GABA-ergic and DA-  
552 ergic neurons. What changes in the two neuron types is their maximal AMPA and NMDA  
553 conductance. The AMPA current flowing into the DA-ergic neuron (calling  $V(t)$  its membrane  
554 voltage) is  $I_{\text{AMPA,DA}}=g_{\text{DA,AMPA}}p_{\text{AMPA}}(t)(E_{\text{AMPA}}-V(t))$ , where  $g_{\text{DA,AMPA}}$  is the maximal conductance of  
555 AMPA receptor on DA-ergic neurons and  $p_{\text{AMPA}}(t)$  is the gating variable that depends on  
556 Glutamatergic units spike train. We use the same notation for NMDA,  
557  $I_{\text{NMDA,DA}}=g_{\text{DA,NMDA}}p_{\text{NMDA}}(t)(E_{\text{NMDA}}-V(t))$ . Let us define  $q_i$  the activation variable of unit  $i$  in the  
558 population of Glutamatergic units. Unit  $i$  is active, i.e. with activation variable  $q_i=1$  (inactive  
559  $q_i=0$ ), for an amount of time equal to 1 ms around the spiking time. The number of inputs that  
560 the neuron receives at time  $t$ , say  $Q_i(t)$ , is the sum of  $q_i(t)$  over all the  $N_E$  Glu units. Not every  
561 input is able to open completely AMPA or NMDA channel, and we use a sigmoidal function to  
562 obtain the variable  $j=1/(1+e^{-(Q_i)^{1.3}})$  that is the fraction of open AMPA and NMDA channels.  
563 Then, in order to obtain the gating variable of AMPA and NMDA channels we use the following  
564 equations:

$$\frac{ds^{act}}{dt} = \frac{j(1-s^{act})}{\tau_{act}} - \frac{(1-j)s^{act}}{\tau_{deact}}$$

$$\frac{ds^{des}}{dt} = \frac{(1-j)(1-s^{des})}{\tau_{desrel}} - \frac{s^{des}}{\tau_{des}}$$

570

571 The gating variable  $p_{AMPA}(t)$  is equal to the product of desensitisation and activation variables,  
 572 i.e.  $p_{AMPA}(t)=s^{act}s^{des}$ , while  $p_{NMDA}(t)$  is equal to the activation variable. The dynamical evolution of  
 573 NMDA and AMPA channels differs also for time scale of activation and deactivation, where the  
 574 last one is much longer in NMDA channels. The input  $j$  is a function of the spiking pattern of  
 575 Glutamatergic pattern, and thus depends on the average firing rate and their synchronization  
 576 level  $f_s$ .

577

578

579 **VTA circuit: GABAergic population.**

580 Voltage dynamics of each GABA neuron is described by Wang-Buzsaki model (see  
 581 appendix I) of fast spiking neurons with a parameter distribution to reflect heterogeneity and  
 582 coupling will be described by the typical electrical coupling function (Wang and Buzsaki, (1996)  
 583 and Kepler et al., (1990)).

584 Each neuron  $i$  is coupled with all the other neurons  $j$  in the population with the typical  
 585 electrical coupling  $I_{ei}=g_{ei}(v_i-v_j)$ . This is a heterogeneous population (Margolis et al., 2012) that  
 586 fires regularly (e.g. pacemaking) at high frequencies. Experimental data suggests that the range  
 587 of firing rates of recorded VTA GABA neurons is very broad with the mean of 19Hz (Steffensen  
 588 et al., 1998). The differences in frequencies are modeled by changing the leak conductance  $g_{lg}$ ,  
 589 according to  $g_{lg}=0.05+0.05*(rnd-0.5)$ , where  $g_{lg}=0.05$  corresponds to frequency of 17 Hz.  
 590 GABA neurons are capable of firing with much higher frequencies in response to excitatory  
 591 synaptic inputs, modeled by NMDA and AMPA currents. The activity of each GABA neuron  
 592 contributes to a GABA current flowing into the DA neuron. Every time a GABA neurons fires, a  
 593 certain amount of neurotransmitter is released, which contributes to activation of the gating  
 594 variable according to the following equation (where we indicate  $v_i$  the voltage of neuron  $i_{th}$ ):

595 
$$\frac{dGABA_i}{dt} = \frac{g_{spike}(v_i)(1-GABA_i)}{\tau_{gact}} - \frac{(1-g_{spike}(v_i))GABA_i}{\tau_{gdeact}},$$

596

$$\text{where } g_{spike} = \frac{1}{1 + \exp\left(\frac{-v_i}{2}\right)}.$$

597 We consider a population of 50 GABA neurons. Every DA neuron receives different GABA  
 598 inputs according to the dynamics of a subpopulation of  $M=10$  randomly chosen GABA units  
 599 neuron.

600 In particular, the gating GABA variable of a specific DA neuron is the average over  $M$   
 601 randomly chose units in the GABA population:

602

603

604

605

606 **VTA circuit: DA-ergic population**

607

608 The model of the DA neuron is a conductance-based one-compartmental model :

609

$$c_m \frac{dv}{dt} = I_K + I_{Ca} + I_{K,Ca} + I_{sNa} + I_{GIRK} + I_h + I_{leak} + I_{Na} + I_{AMPA} + I_{NMDA} + I_{GABA}$$

610 Where  $v$  is the voltage and the first seven currents represent intrinsic currents: a calcium current  
611  $I_{Ca}$ , a calcium-dependent potassium current  $I_{K,Ca}$ , a potassium current  $I_K$ , a subthreshold sodium  
612 current  $I_{sNa}$ , a sodium current  $I_{Na}$  and a leak current  $I_{leak}$ . AMPA and NMDA receptor currents  
613 ( $I_{AMPA}$  and  $I_{NMDA}$ , respectively) model excitatory inputs and GABA receptor current ( $I_{GABA}$ )  
614 models inhibitory inputs. The first subgroup of currents mostly contributes to pacemaking  
615 mechanisms of DA neuron, while synaptic inputs produce bursts and pauses. In Appendix 1 we  
616 write the details of such currents, their dynamics and voltage dependence while in table 1 we  
617 report the parameters, chosen according to Morozova et al (2016). We model a heterogeneous  
618 population of ten DA neurons, each one receiving inputs from different GABA neurons and with  
619 different leakage currents extracted randomly in the interval [0.13:0.23] mS/cm<sup>2</sup>.

620

### 621 **Output: DA release.**

622 Every DA neuron releases a certain amount of Dopamine depending on its spike train  $\{t_s\}$ . The  
623 following equation relates the spiking times of DA-ergic neuron to the amount of dopamine  
624 released:

$$\frac{d[DA]}{dt} = [DA]_{max} \sum_s \delta(t - t_s) - \frac{[DA]V_{max}}{K_m + [DA]}$$

628 where  $\delta(t-t_s)$  is a delta function that increases of a finite fraction  $[DA]_{max}$  the dopamine  
629 concentration  $[DA]$ .

630 The second term represents DA uptake described by Michaelis-Menten equation, where  
631  $V_{max}=0.004 \mu\text{M}/\text{ms}$  is the maximal rate of uptake by a transporter and  $K_m=0.2 \mu\text{M}$  is the affinity  
632 of the transporter for dopamine. The total amount of Dopamine released by the system is the  
633 linear sum of the dopamine released by each DA neuron.

634

### 635 **Ethanol effects: EtOH concentration and model parameters change**

636

637 Ethanol targets we take into account can be separated in two kinds: intrinsic and input  
638 targets.

639 *DA intrinsic currents:* Ethanol effects on intrinsic activity are the increase in GIRK current  
640 conductance and in HCN channels conductance. We calibrate Ethanol effects in a way that high  
641 EtOH concentration reproduces the results shown in McDaid et al. (2007). Ethanol increases of  
642 around 150% DA-ergic neuron firing rate in vitro and, in absence of  $I_h$  current, Ethanol  
643 produces a decrease in DA-ergic neuron firing rate. In panel a) of Fig.7 we plot the effects of  
644 increase in  $g_h$  and  $g_{GIRK}$ . The increase in  $I_h$  conductance has a double effect, i.e. at very high  
645 values of  $g_h$  DA-ergic neuron stops firing while for low values, an increase of in  $I_h$  conductance  
646 increases DA-ergic neuron activity. In order to reproduce the result of Mc Daid et al. we impose  
647 EtOH to move such parameters as shown by the arrow in the Fig.7a. By doing so, we can see in  
648 panel b) how the effects we were looking for are well captured. Through this calibration we  
649 obtain control and high EtOH concentration values of intrinsic currents in DA-ergic neuron.  
650 Then, we suppose such parameter to depend on EtOH concentration through a sigmoidal  
651 function, and in panel c) of Fig.7 we show how  $g_h$  and  $g_{GIRK}$  depend on EtOH concentration  
652  $[EtOH]$ .

653 Regarding EtOH effects on VTA input we take into account an increase in AMPA/NMDA  
654 ratio and an increase in GABA conductance of DA-ergic neurons. To calibrate AMPA/NMDA  
655 ratio increase we follow the observations of Saal et al. (2003) where the ratio between AMPA  
656 and NMDA EPSP was increased by a factor around 1.5 with a concentration  $[EtOH] = 0.02\text{g}/\text{Kg}$ .  
657 As we are considering concentration up to 2g/Kg in order to reproduce EtOH dose concentration  
658 effects as reported by Mereu et al. (1984) we suppose an increase up to three times for very high  
659 EtOH doses. Accordingly, in panel c) of Fig.7 we plot the variation of  $g_{DA,AMPA}/g_{DA,NMDA}$  in  
660 function of Ethanol concentration  $[EtOH]$ . Again, in the view of reproducing an increase in DA  
661 neuron average firing rate and bursting and in accordance with experimental observations by



662 Ding et al. (2012) we model the increase in the ratio by the increase of AMPA conductance. For  
 663 the sake of completeness we show in Fig. 7d that the opposite choice (decreasing NMDA  
 664 conductance) would yield a purely inhibitory of EtOH on DA neuron activity and DA release.

665 Regarding EtOH effects on  $g_{GABA}$  we model an increase in GABA conductance of DA  
 666 neurons as it has been showed by Theile et al. (2008) that Ethanol enhances GABA transmission  
 667 in DA neurons in the VTA. We calibrate it in a way that our model is able to reproduce the result  
 668 by Mereu et al. (1984), where it is shown that high EtOH concentrations ( $[EtOH]>2g/Kg$ )  
 669 produces a decrease in DA neurons firing rate with respect to baseline level. We choose the  
 670 function  $g_{GABA}([EtOH])$  (see panel c) of Fig.7) in a way to reproduce this effect and to observe a  
 671 reasonable (1-4Hz) firing rate of DA neuron in control condition ( $[EtOH]=0g/Kg$ ), as shown in  
 672 panel d) of Fig.7.  
 673

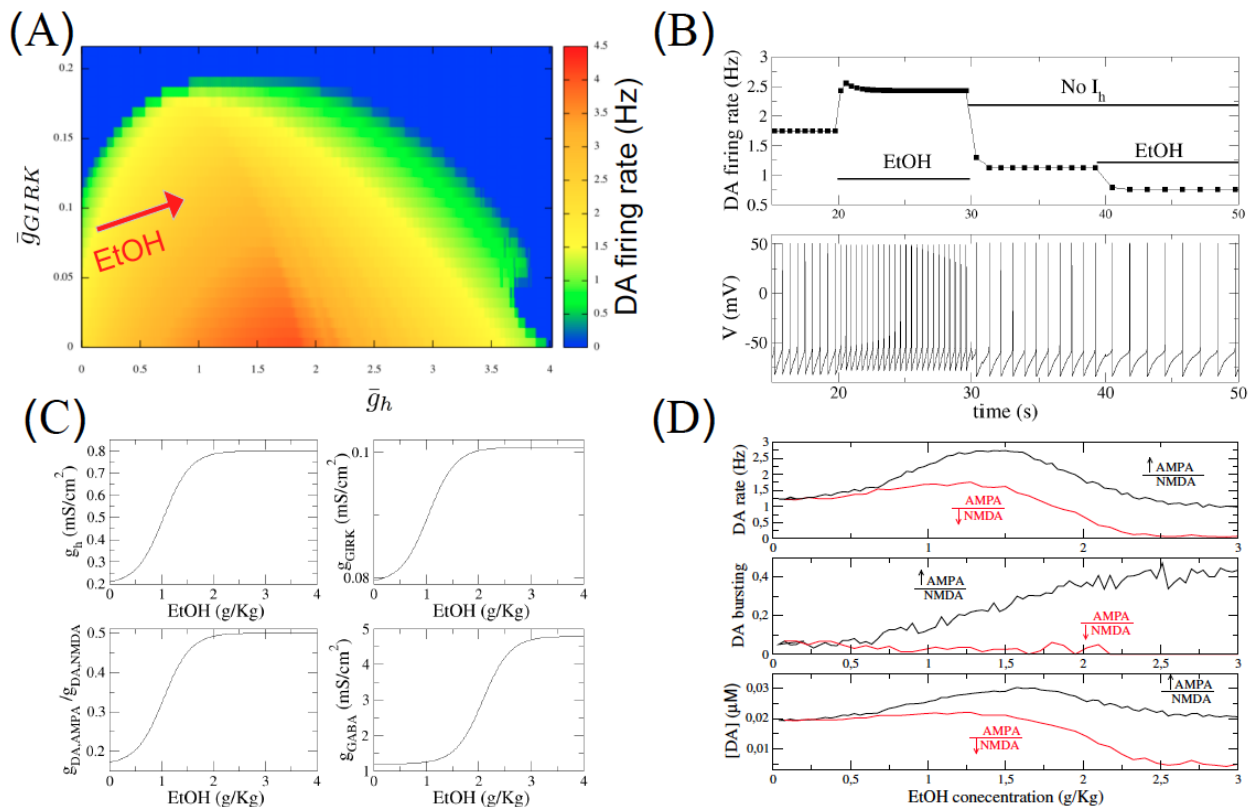

674

675 **Figure 7. EtOH model calibration.** (A) Combined effect of increasing  $g_h$  and  $g_{GIRK}$  on DA neuron firing rate. In  
 676 accordance with experimental observations at high values of  $g_h$  DA firing rate decreases. The red arrow represents  
 677 our parameter setup for EtOH effects on DA neuron intrinsic activity. (B) The model reproduces the observation that  
 678 EtOH has inhibitory effect when  $g_h=0$ . (C) Parameters dependence on EtOH concentration. (D) DA neuron  
 679 average firing rate, bursting and DA release from the population of DA neurons in function of EtOH concentration.  
 680 Black curves refer to the case in which we increase AMPA conductance to increase AMPA/NMDA ratio as in Saal  
 681 et al. while red ones refer to the case in which we decrease NMDA conductance to obtain the same ratio increase  
 682 (Input parameters are the same of Fig.1).  
 683  
 684

### 685 *Spike within bursts SWB*

686 To analyze the bursting features of DAergic neuron we calculate the percentage of spikes within  
 687 a burst (SWB). This measure is calculated defined on the basis of 5 minutes of simulation time  
 688 with a minimum 200 spikes in this time interval. Bursts are identified as discrete events  
 689 consisting of a sequence of spikes with burst onset defined by two consecutive spikes within an  
 690 interval less than 80 msec, and burst termination defined by an interspike interval greater than

691 160 msec (Grace and Bunney, 1984b). The SWB was calculated as a number of spikes within  
 692 bursts divided by the total number of spikes.

693

694

695 *Table: Model parameters*

| Parameter             | Description                                                  | Value           |
|-----------------------|--------------------------------------------------------------|-----------------|
| $C_m$                 | Membrane capacitance of DA and GABA neurons                  | $1\mu F / cm^2$ |
| $\bar{g}_K$           | Maximal potassium conductance on DA neuron                   | $1mS / cm^2$    |
| $\bar{g}_{Ca}$        | Maximal calcium conductance on DA neuron                     | $2.5mS / cm^2$  |
| $\bar{g}_{KCa}$       | Maximal calcium-dependent potassium conductance on DA neuron | $7.8mS / cm^2$  |
| $\bar{g}_{sNa}$       | Maximal subthreshold sodium conductance on DA neuron         | $0.13mS / cm^2$ |
| $g_l$                 | Leak conductance on DA neuron                                | $0.18mS / cm^2$ |
| $\bar{g}_{Na}$        | Maximal sodium conductance on DA neuron                      | $50mS / cm^2$   |
| $\bar{g}_{NaG}$       | Maximal sodium conductance on GABA neuron                    | $22mS / cm^2$   |
| $\bar{g}_{Kg}$        | Maximal potassium conductance on GABA neuron                 | $7mS / cm^2$    |
| $\bar{g}_{AMPA,GABA}$ | AMPA conductance on GABA neurons                             | $0.8mS / cm^2$  |
| $\bar{g}_{NMDA,GABA}$ | NMDA conductance on GABA neurons                             | $0.5mS / cm^2$  |
| $\bar{g}_{Gap}$       | Gap junction coupling between GABA neurons                   | $0.02mS / cm^2$ |
| $\bar{g}_{NMDA}$      | Maximal NMDA conductance on DA neuron                        | $18mS / cm^2$   |
| $g_h$                 | Maximan HCN conductance on DA neuron                         | varied          |
| $g_{AMPA}$            | AMPA conductance on DA neurons                               | varied          |
| $g_{GABA}$            | GABA conductance on DA neurons                               | varied          |
| $\bar{g}_{GIRK}$      | Maximal GIRK conductance on DA neuron                        | varied          |
| $E_h$                 | HCN reversal potential on DA neuron                          | $-20mV$         |
| $E_K$                 | Potassium reversal potential on DA and GABA neurons          | $-90mV$         |
| $E_{Ca}$              | Calcium reversal potential on DA neuron                      | $50mV$          |
| $E_{Na}$              | Sodium reversal potential on DA and GABA neurons             | $55mV$          |
| $E_l$                 | Leak reversal potential on DA neuron                         | $-35mV$         |
| $E_{lg}$              | Leak reversal potential on GABA neuron                       | $-51mV$         |
| $E_{NMDA}$            | NMDA reversal potential on DA and GABA neurons               | $0mV$           |
| $E_{AMPA}$            | AMPA reversal potential on DA and GABA neurons               | $0mV$           |
| $E_{GABA}$            | GABA reversal potential on DA neuron                         | $-90mV$         |
| $\tau_{aact}$         | AMPA receptor activation time on DA and GABA neurons         | $1ms$           |
| $\tau_{adeact}$       | AMPA receptor deactivation time on DA and GABA neurons       | $1.6ms$         |
| $\tau_{nact}$         | NMDA receptor activation time on DA and GABA neurons         | $7ms$           |
| $\tau_{ndeact}$       | NMDA receptor deactivation time on DA and GABA neurons       | $170ms$         |

|                 |                                                        |        |
|-----------------|--------------------------------------------------------|--------|
| $\tau_{gact}$   | GABA receptor activation time on DA and GABA neurons   | 0.08ms |
| $\tau_{gdeact}$ | GABA receptor deactivation time on DA and GABA neurons | 10ms   |
| $I_{app}$       | Applied current on DA and GABA neurons                 | 0      |

696  
697  
698  
699  
700

## 701 References

702  
703  
704  
705  
706  
707  
708  
709  
710  
711  
712  
713  
714  
715  
716  
717  
718  
719  
720  
721  
722  
723  
724  
725  
726  
727  
728  
729  
730  
731  
732  
733  
734  
735

- Covey, Dan P., Mitchell F. Roitman, and Paul A. Garris. *Trends in neurosciences* 37.4 (2014): 200-210.
- Zheng-Ming Ding, Eric A. Engleman, Zachary A. Rodd, and William J. McBride, *Alcoholism: Clinical and Experimental Research* (2012) Vol.3.
- Dyr, W., et al., *Alcohol* 10.3 (1993): 207-212
- Fujisawa, Shigeyoshi, and György Buzsák. *Neuron* 72.1 (2011): 153-165.
- Gonzales, et al *Pharmacology & therapeutics* 103.2 (2004): 121-146;
- Joshua, M., Adler, A., Prut, Y., Vaadia, E., Wickens, J. R., & Bergman, H. (2009). *Neuron*, 62(5), 695-704.
- Ha, Joon, and Alexey Kuznetsov. *PLoS One* 8.7 (2013): e69984.
- Mereu, Giampaolo, Fabio Fadda, and Gian Luigi Gessa. *Brain research* 292.1 (1984): 63-69.
- Kepler et al. *Science* 248.4951 (1990): 83-85.
- Margolis et al., (2012)
- Mokdad, Ali H., et al. *Jama* 291.10 (2004): 1238-1245.
- Morikawa, Hitoshi, and Richard A. Morrisett. *International review of neurobiology* 91 (2010): 235-288. EndFragment
- Morozova, E. O., Zakharov, D., Gutkin, B. S., Lapish, C. C., & Kuznetsov, A. (2016). *PLOS Computational Biology*, 12(12), e1005233.
- Morozova, E. O., et al. *Journal of Neurophysiology* 116.4 (2016): 1900-1923.
- Margolis, Elyssa B., et al. *PloS one* 7.7 (2012): e42365 EndFragment
- Pierce, R. Christopher, and Vidhya Kumaresan, *Neuroscience & biobehavioral reviews* 30.2 (2006): 215-238.
- Roeper, Jochen. *Trends in neurosciences* 36.6 (2013): 336-342.
- Saal, Daniel, et al. *Neuron* 37.4 (2003): 577-582.
- Samson, Herman H., et al. , *Brain research bulletin* 30.1-2 (1993): 133-141
- Steffensen, Scott C., et al. *The Journal of neuroscience* 18.19 (1998)
- Stobbs, Sarah H., et al. *Journal of Pharmacology and Experimental Therapeutics* 311.1 (2004): 282-289.
- Theile JW, Morikawa H, Gonzales RA, Morrisett RA, *Alcohol Clin Exp Res* (2008) 32(6):1040–1048
- Tu, Yali, et al. *Journal of Neuroscience* 27.17 (2007): 4765-4775.
- Wang and Buzsáki. *The journal of Neuroscience* 16.20 (1996): 6402-6413
- Yim, H. J., & Gonzales, R. A. (2000). *Alcohol*, 22(2), 107-115.

736  
737  
738

## 737 Appendix 1

### 739 A1.1 DA neuron model details

740 Two Calcium currents are present in DA neuron model: an L-type voltage-dependent calcium  
741 current  $I_{Ca} = g_{Ca}(E_{Ca} - v)$  and an SK-type calcium-dependent potassium current

742  $I_{K,Ca} = g_{K,Ca}(E_{K,Ca} - v)$ . Gating of the calcium current is instantaneous (Wilson and Callaway,  
743 2000; Helton et al., 2005) and described by the function

$$744 \quad g_{Ca} = \bar{g}_{Ca} \cdot \frac{\alpha_c^4(v)}{\alpha_c^4(v) + \beta_c^4(v)}$$

745 Calibration of the calcium gating function reflects an activation threshold of an L-type current,  
746 which is significantly lower in DA neurons than in other neurons,  $\sim -50\text{mV}$  (Wilson and  
747 Callaway, 2000; Durante et al., 2004). Calcium enters the cell predominantly via the L-type  
748 calcium channel. Contribution due to the NMDA channel is minor (Oster and Gutkin, 2011). A  
749 large influx of  $\text{Ca}^{2+}$  leads to activation of the SK current, which contributes to repolarization as  
750 well as after hypolarization of the DA cell. Dependence of the SK current ( $I_{K,Ca}$ ) on calcium  
751 concentration is modeled as follows (Kohler et al., 1996)

$$752 \quad g_{K,Ca} = \bar{g}_{K,Ca} \cdot \frac{[\text{Ca}^{2+}]^4}{[\text{Ca}^{2+}]^4 + [\text{K}^+]^4}$$

753 Calcium concentration varies according to the following equation:

754

$$755 \quad \frac{d[\text{Ca}^{2+}]}{dt} = \frac{2\beta}{r} \left( \frac{(g_{Ca}(v) + 0.1g_l)(E_{Ca} - v) - P_{Ca}u}{zF} \right)$$

756 This equation represents balance between  $\text{Ca}^{2+}$  entry via the L channel and a  $\text{Ca}^{2+}$  component of  
757 the leak current, and  $\text{Ca}^{2+}$  removal via a pump. In the calcium equation,  $\beta$  is the calcium  
758 buffering coefficient, i.e. the ratio of free to total calcium,  $r$  is the radius of the compartment,  $z$   
759 is the valence of calcium, and  $F$  is Faraday's constant.  $P_{Ca}$  represents the maximum rate of  
760 calcium removal through the pump.

761 The neuron is repolarized by the activation of a large family of voltage-gated potassium  
762 channels. The model contains voltage-dependent  $\text{K}^+$  current  $I_K = g_K(E_K - v)$ . Conductance of  
763 this current is given by a Boltzmann function:

$$764 \quad g_K = \bar{g}_K \cdot \frac{1}{1 + \exp\left(\frac{-(v + 10)}{7}\right)}$$

765 The DA neuron expresses voltage gated sodium channels that carry a large transient current  
766 during action potentials (the spike-producing sodium current and a noninactivating current  
767 present at subthreshold voltages (a subthreshold sodium current  $I_{sNa} = g_{sNa}(E_{Na} - v)$ ). Even  
768 though the persistent subthreshold sodium current is much smaller than the transient spike-  
769 producing current, it influences the firing pattern and the frequency of the DA neuron by  
770 contributing to depolarization below the spike threshold. We modeled the voltage dependence of  
771 the subthreshold sodium current as follows

$$772 \quad g_{sNa} = \bar{g}_{sNa} \frac{1}{1 + \exp\left(\frac{-(v + 50)}{5}\right)}$$

773 The kinetics and the voltage dependence of the subthreshold sodium current were taken from  
774 Carter et al. (2012). The spike-producing sodium current has the form of Hodgkin-Huxley model

775  $I_{Na} = g_{Na} m^3 h (E_{Na} - v)$ , where sodium activation and inactivation channels obey the following  
776 differential equations:

777

$$778 \quad \frac{dm}{dt} = \alpha_m(v)(1 - m) - \beta_m(v)(m)$$

$$\frac{dh}{dt} = \alpha_h(v)(1 - h) - \beta_h(v)(h)$$

779 where the rate constants  $\alpha_x$  and  $\beta_x$  have the following form:

$$\alpha_m(v) = \frac{0.1(v+25)}{\exp(\frac{v+25}{10}) - 1}; \beta_m(v) = 4 \exp(v/18)$$

780

$$\alpha_h(v) = 0.07 \exp(v/20); \beta_h(v) = \frac{1}{\exp(\frac{v+30}{10}) + 1}$$

781

782 The leak current ( $I_l = g_l(E_l - v)$ ) in the model has the reversal potential of -35 mV, which is  
 783 higher than in the majority of neuron types. In DA neurons, several types of depolarizing,  
 784 nonselective cation currents are expressed, which likely contribute to depolarization during  
 785 interspike intervals. The GIRK current  $I_{GIRK} = g_{GIRK}(E_K - v)$  is modeled as a leak potassium  
 786 current. The HCN channel  $I_h = g_h q(E_h - v)$  depends from the activation variable  $q$  that obeys to  
 787 the following differential equation:

$$\frac{dq}{dt} = \frac{q - Q(v)}{\tau_q(v)}$$

788

$$Q(v) = \frac{1}{1 + \exp(\frac{v+70}{10})}$$

$$\tau_q(v) = 320 + 1850 \cdot \exp(-\frac{v+80}{18})$$

789 where, in the last equation, quantities are measured in ms.

790

## 791 **A1.2 GABA neurons model**

792 GABA neuron dynamics obeys the following differential equations:

$$c_m \frac{dv_i}{dt} = \bar{g}_{Na} m^3(v_i) h(E_{Na} - v_i) + \bar{g}_K n(E_K - v_i) + g_{lg}(E_{lg} - v_i) + g_{GABA,NMDA} p_{NMDA}(E_{NMDA} - v_i) +$$

$$+ g_{GABA,AMPA} p_{AMPA}(E_{AMPA} - v_i)$$

793

$$\frac{dh}{dt} = \alpha_h(v)(1-h) - \beta_h(v)h$$

$$\frac{dn}{dt} = \alpha_n(v)(1-n) - \beta_n(v)n,$$

794 where  $v_i$  is the voltage of cell  $i$  and the activation variable equations are completed by the

795 following relations:

796

$$m = \frac{\alpha_m}{\alpha_m + \beta_m}$$

797

$$\alpha_m = \frac{0.1(v_i + 30)}{1 - \exp(\frac{-(v_i + 30)}{10})}$$

798

$$\beta_m = 4 \exp(\frac{-(v_i + 55)}{18})$$

$$799 \quad \beta_h = \frac{1}{1 + \exp\left(\frac{-(v_i + 23)}{10}\right)}$$

$$800 \quad \alpha_n = \frac{0.01(v_i + 29)}{1 - \exp\left(\frac{-(v_i + 29)}{10}\right)}$$

$$801 \quad \beta_n = 0.0875 \exp\left(\frac{-(v_i + 39)}{80}\right)$$
